# Supplementary material for: Differential Regulation of 6- and 7-Transmembrane Helix Variants of μ-Opioid Receptor in Response to Morphine Stimulation
Source: PubMed Central journal article supplement (PMC4640872; doi:10.1371/journal.pone.0142826), 2015-11-10
Supplement: pone.0142826.s002.pdf [file pone.0142826.s002.pdf]

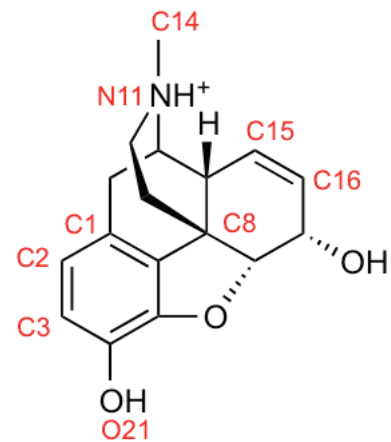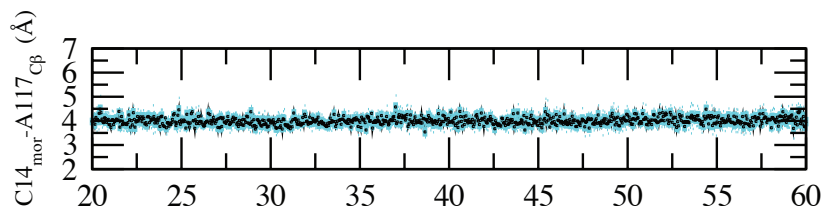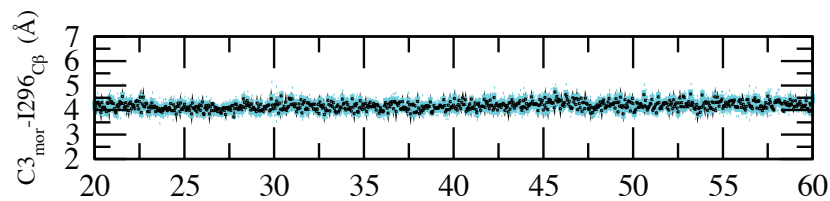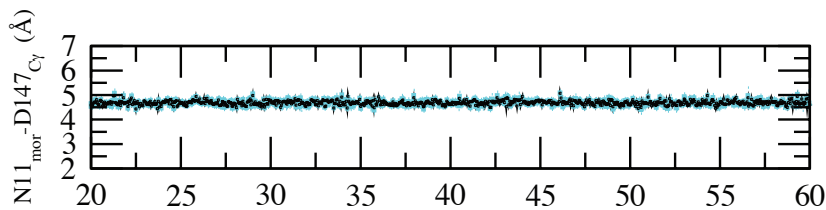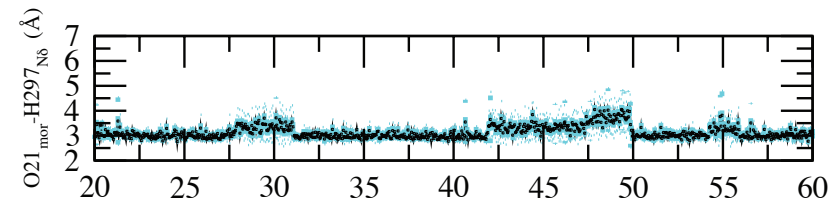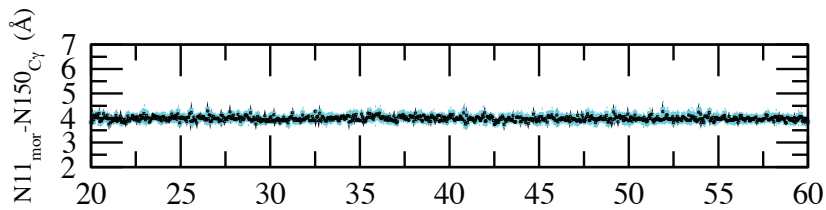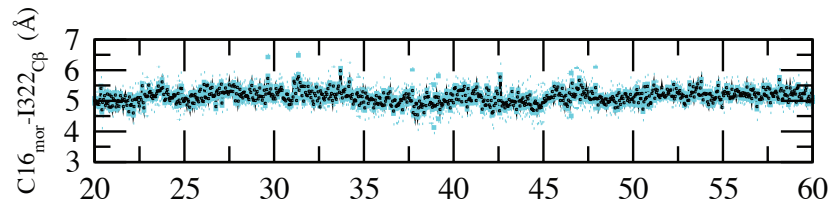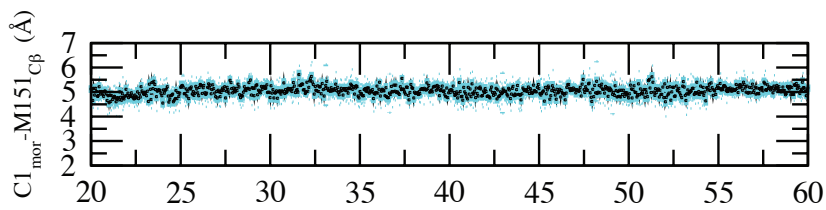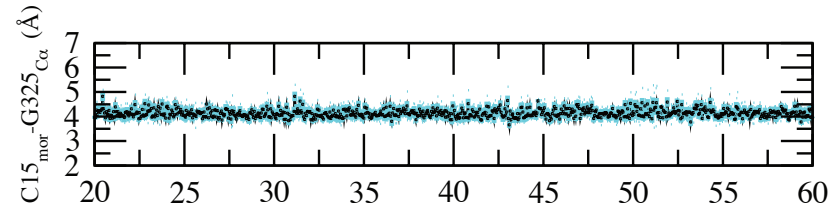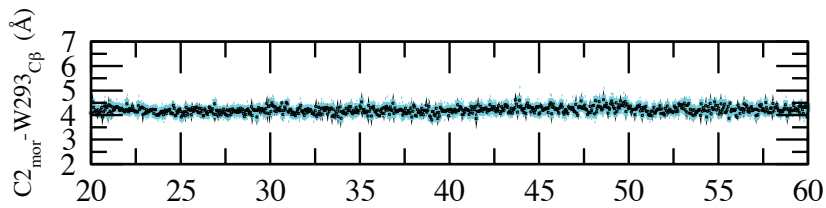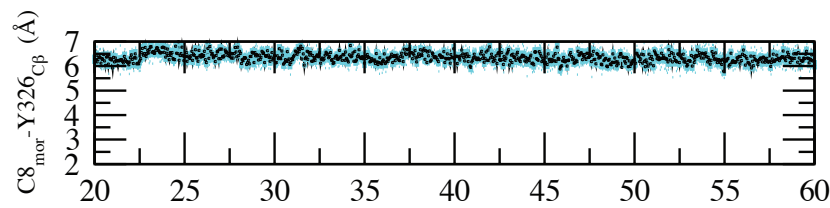

time (ns)

time (ns)
